# Supplementary material for: Boosting immunotherapy of triple negative breast cancer through the synergy of mild PTT and Fe-loaded organosilica nanoparticles
Source: Royal Society of Chemistry journal article supplement (doi:10.1039/d2tb01424f), 2022-01-01
Supplement: d2tb01424f1.pdf [file d2tb01424f1.pdf]

**Boosting immunotherapy of triple negative breast cancer through the synergy of mild PTT and Fe-doped organo-silica nanoparticles.**

Ben Yang<sup>1,2</sup>, Hui Fu<sup>2</sup>, Ronghua Kong<sup>2</sup>, Gang Zheng<sup>2</sup>, Xihong Wang<sup>2</sup>, Yang Dong<sup>2,\*</sup>,  
and Zhenlin Yang<sup>3,4,\*</sup>

<sup>1</sup> Shandong University Cancer Center, Jinan, Shandong, 250012 China;

<sup>2</sup> Department of Breast Surgery, Shandong Cancer Hospital and Institute, Shandong First Medical University and Shandong Academy of Medical Sciences, Jinan, Shandong, 250117 China;

<sup>3</sup> Cheeloo College of Medicine, Shandong University, Jinan, Shandong, 250012 China;

<sup>4</sup> Department of Thyroid and Breast Surgery, Binzhou Medical University Hospital, Binzhou, Shandong, 256603, China;

Corresponding authors:

Prof. Zhenlin Yang, Cheeloo College of Medicine, Shandong University, Jinan, Shandong, 250012 China; Department of Thyroid and Breast Surgery, Binzhou Medical University Hospital, Binzhou, Shandong, 256603, China

E-mail: [ikb0607@163.com](mailto:ikb0607@163.com)

Prof. Yang Dong, Department of Breast Surgery, Shandong Cancer Hospital and Institute, Shandong First Medical University and Shandong Academy of Medical Sciences, Jinan, Shandong, 250117 China;

E-mail: [sdxtdongyang@163.com](mailto:sdxtdongyang@163.com)

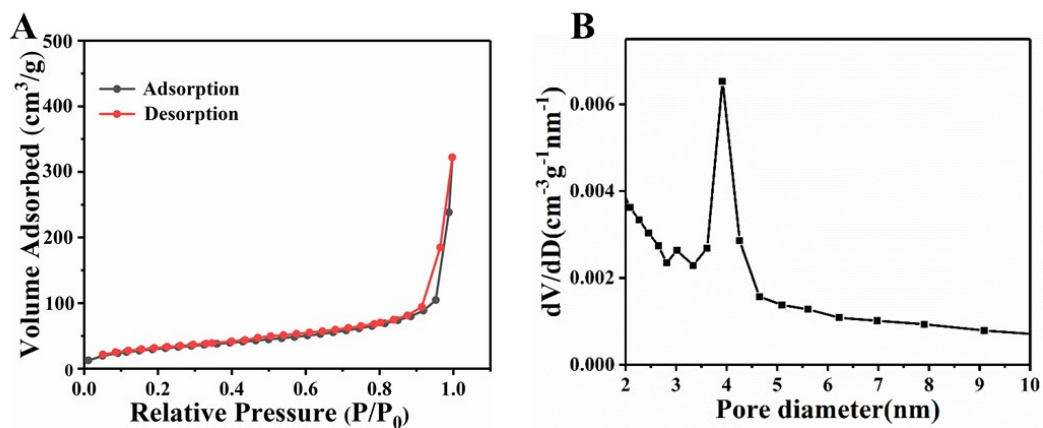

**Figure S1.** (A) N<sub>2</sub> adsorption-desorption isotherms and (B) pore-size distributions of MON.

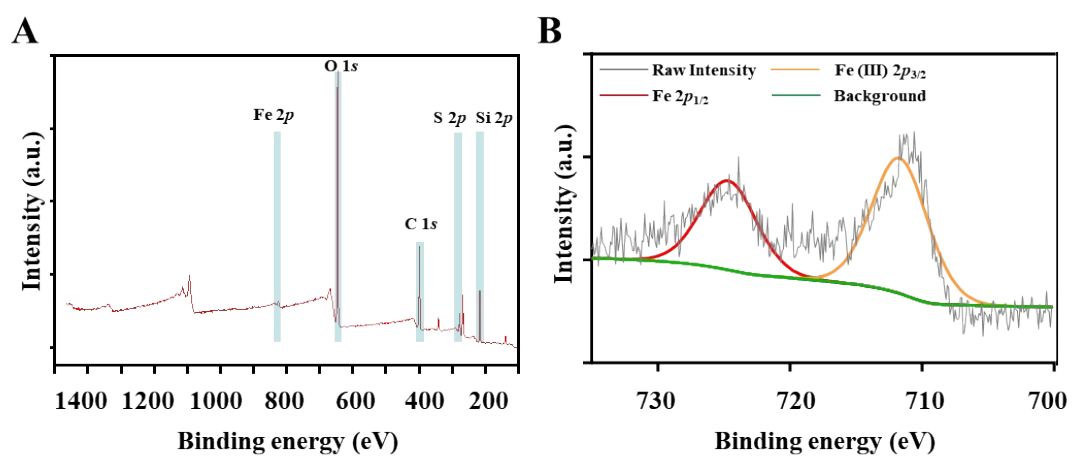

**Figure S2.** (A) XPS survey spectrum of HMONs. (B) Local XPS spectra for the Fe elementary analyses of IMOFHs.

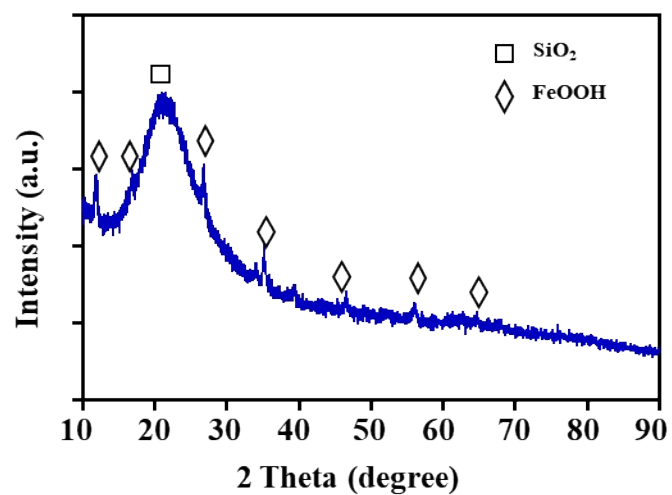

**Figure S3.** XRD patterns of MOF. Square symbol indicated amorphous peak of SiO<sub>2</sub> (PDF#81-0066), while diamond symbol indicated the characteristic peaks of FeOOH (PDF#70-0714)

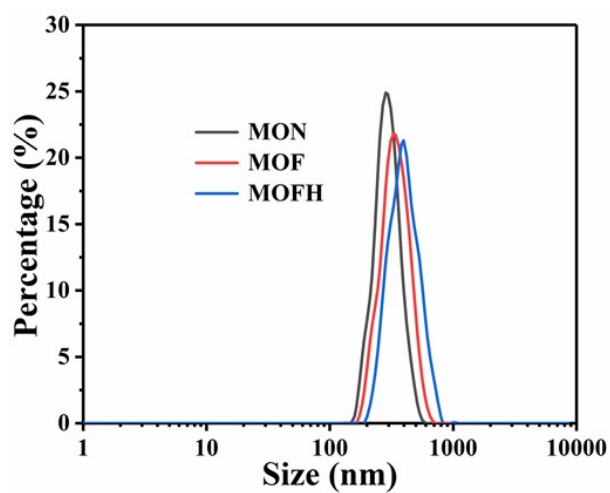

**Figure S4.** Particle size distribution of MON, MOF and MOFH.

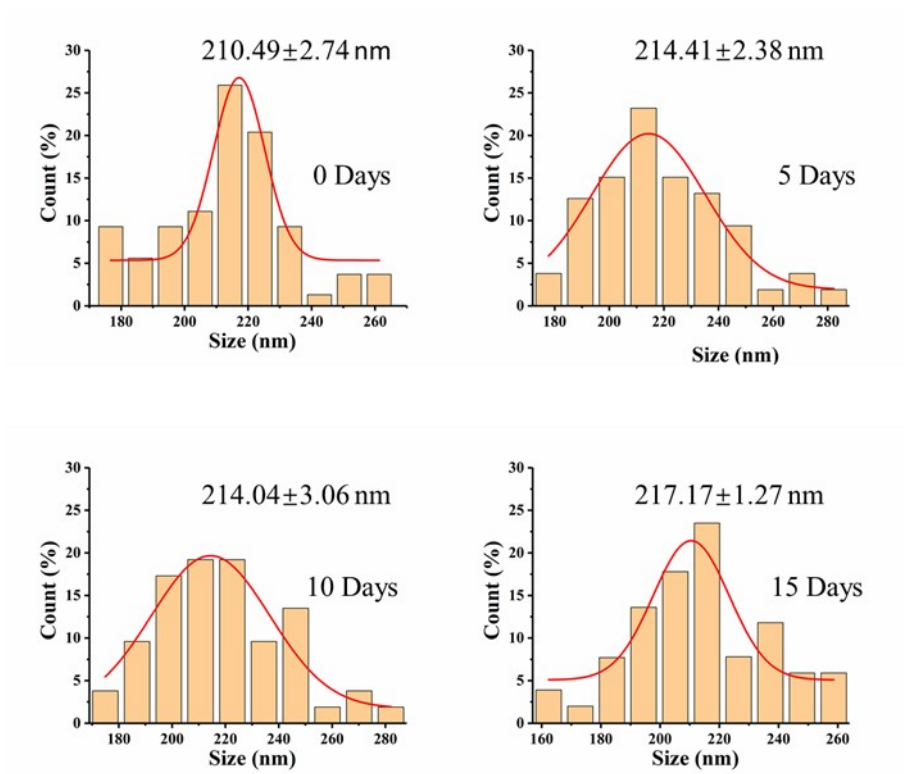

**Figure S5.** Particle size change of MOFH dispersed in PBS buffer for different time.

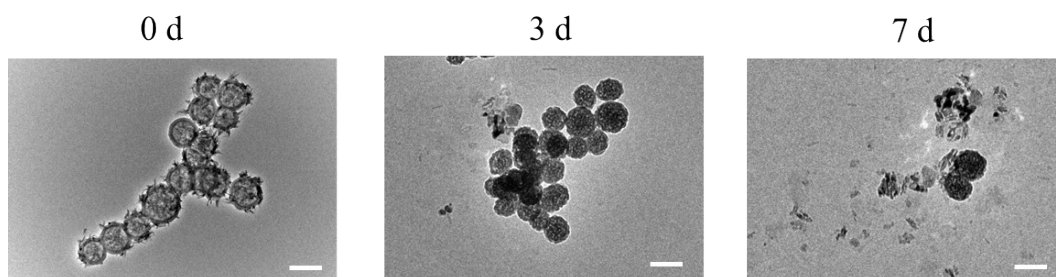

**Figure S6.** TEM images of MOFH after degradation in PBS (pH = 6.5) and the presence of GSH (10 mM) for 0, 7, and 14 days. Scale bars: 200 nm.

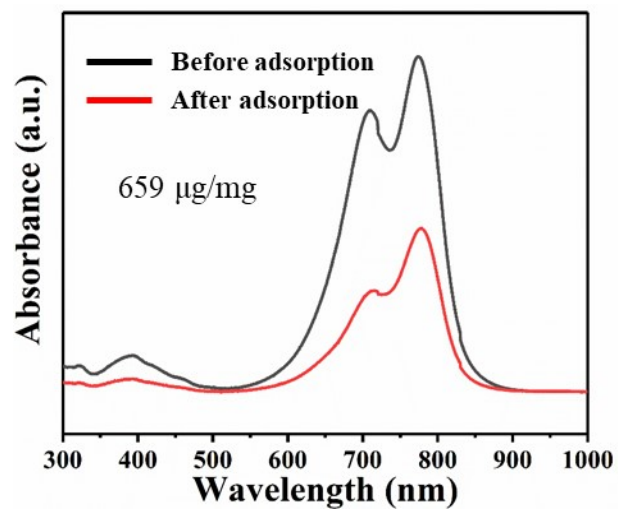

**Figure S7.** UV-vis absorption spectra of ICG solutions before and after the incubation with MOFH.

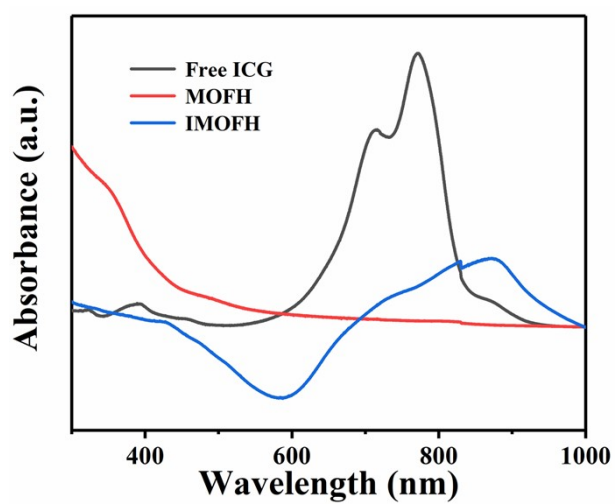

**Figure S8.** UV-vis absorption spectra of Free ICG, MOFH, and IMOFH.

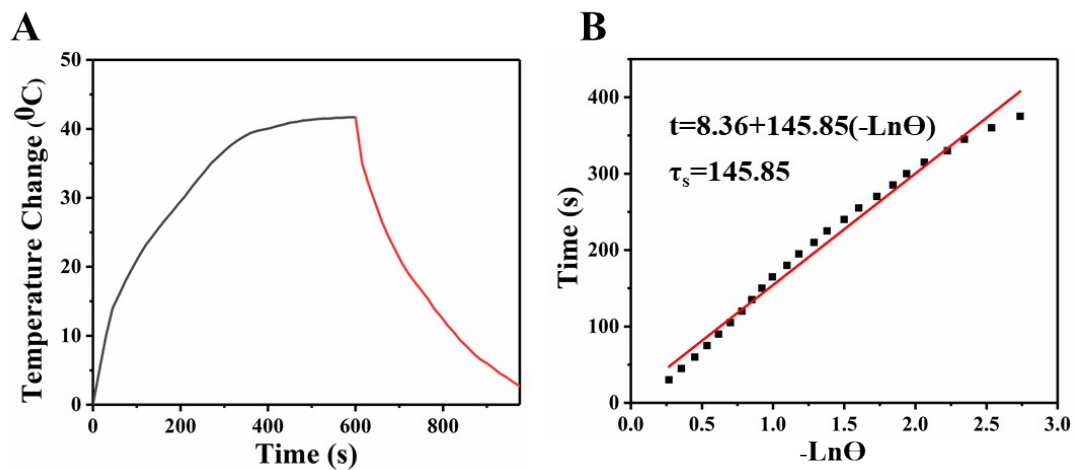

**Figure S9.** (A) The heating and cooling curve of the aqueous solution of IMOFH after NIR radiation. (B) The cooling period versus negative natural logarithm of driving force temperature.

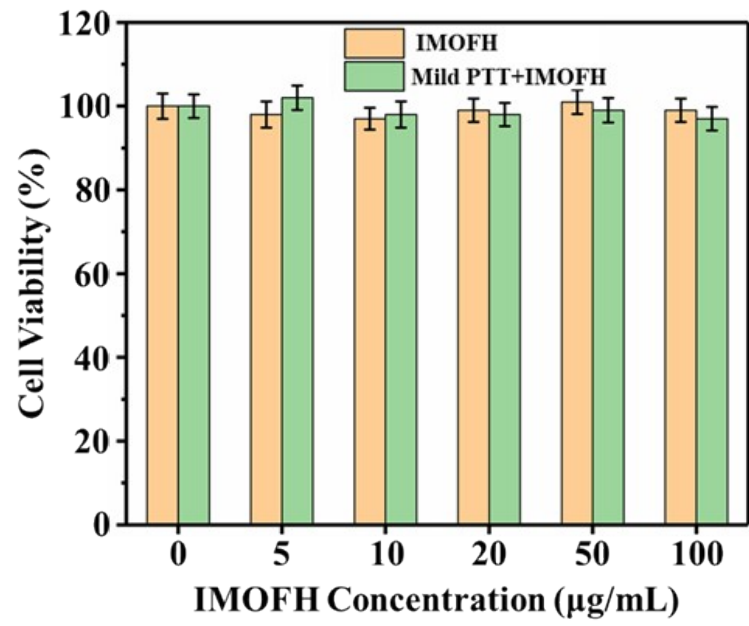

**Figure S10.** LO2 cells viability incubated with IMOFH with or without mild PTT.

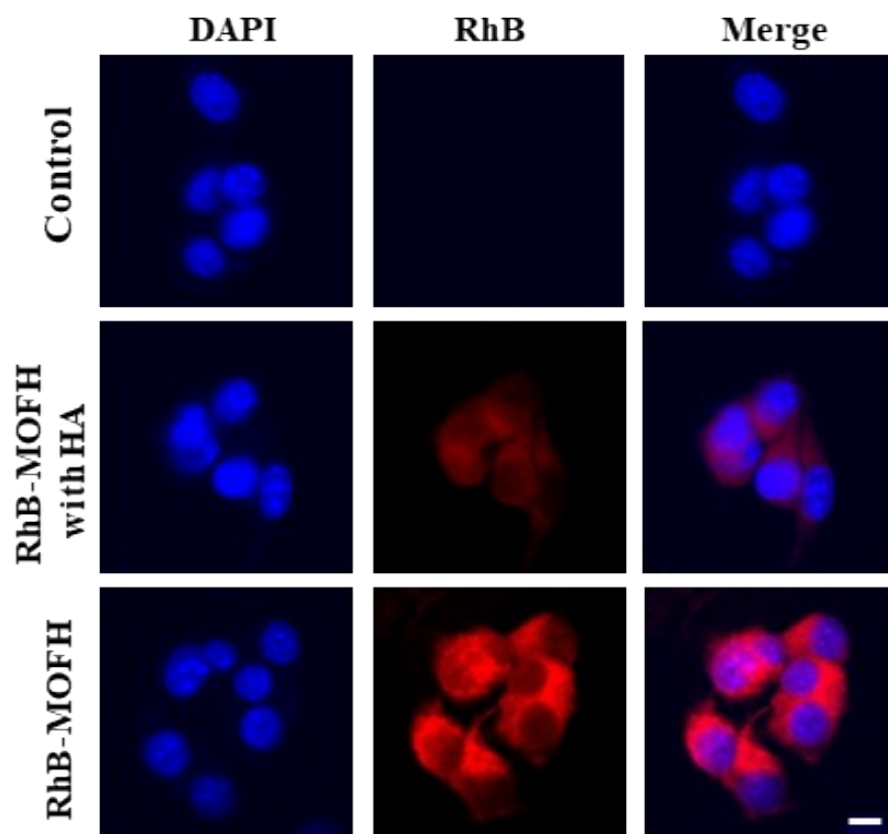

**Figure S11.** Confocal laser scanning microscopy (CLSM) of 4T1 intracellular uptake of Rhodamine B (RhB)-loaded MOFH with or without HA pre-incubated. Scale bar = 20  $\mu\text{m}$ .



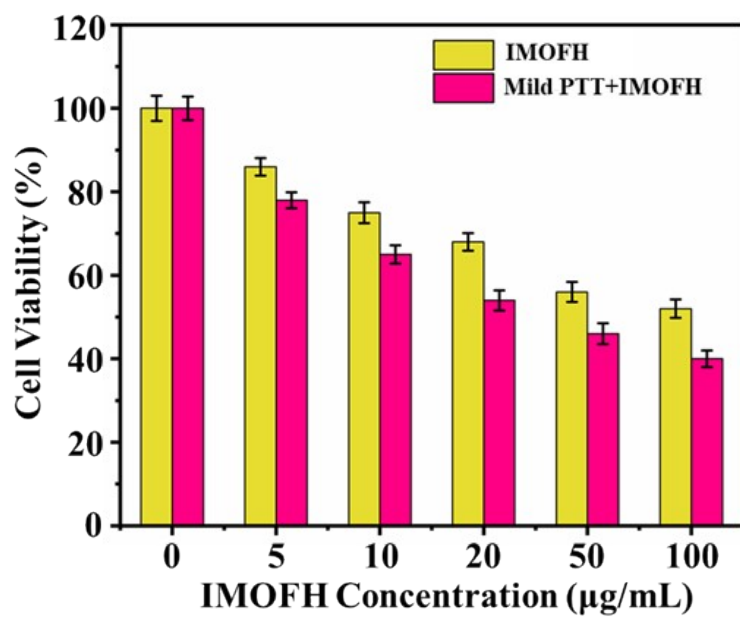

**Figure S12.** 4T1 cells viability incubated with IMOFH with or without mild PTT.

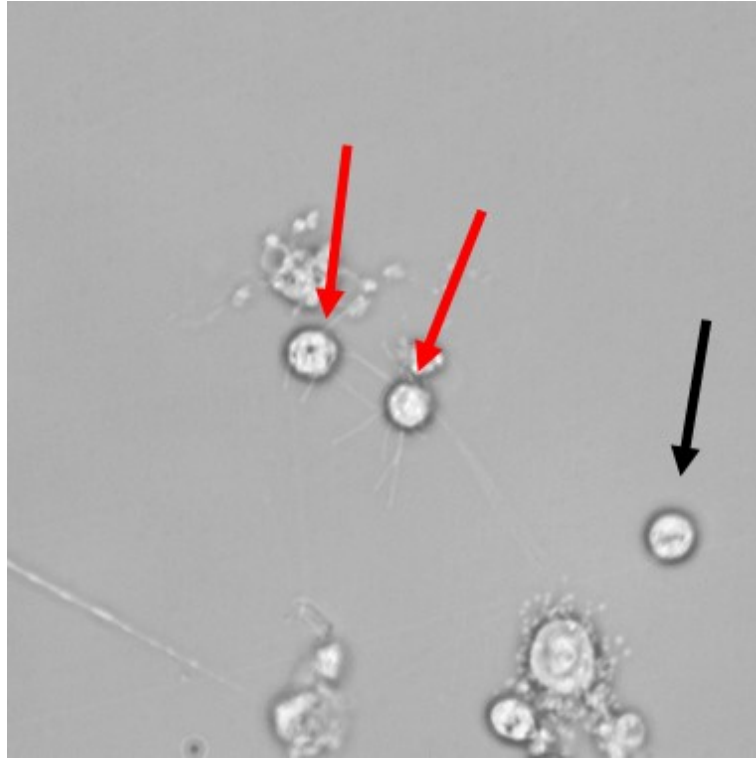

**Figure S13.** The photos of bone marrow derived dendritic cells (BMDCs) stimulated with tumor-related antigen. Red arrows: matured DCs; Black arrow: inactivated DCs.

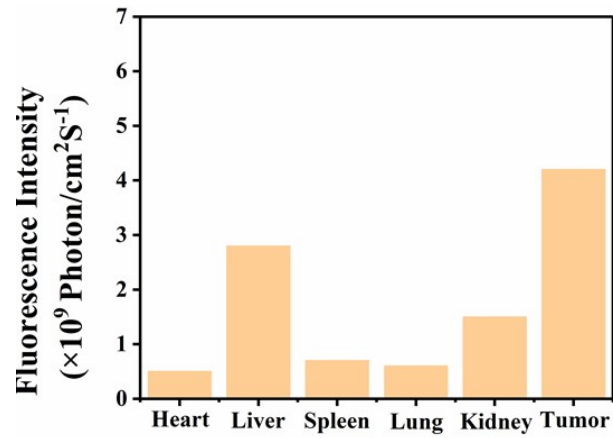

**Figure S14.** Quantification the mean fluorescence in organ and tumor regions by *in vivo* imaging.

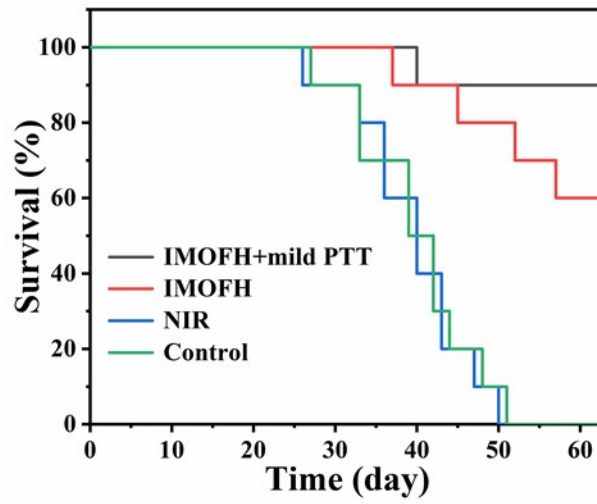

**Figure S15.** The survival curve of tumor-bearing mice in response to different treatments.

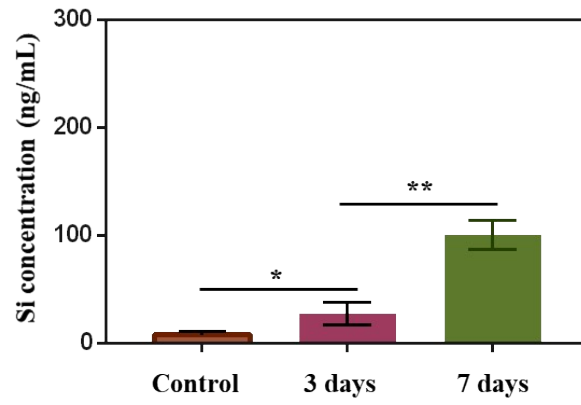

**Figure S16.** Si concentration in digested tumor supernatant for 0 (control), 7, and 14 days. All data are presented as the mean  $\pm$  SD; n = 3. \*P < 0.05, \*\*P < 0.01.
